# Supplementary material for: What Matters Most in Simulation Scenario Design? A Mixed-Methods Analysis of Expert Perspectives
Source: Research Square preprint supplement (doi:10.21203/rs.3.rs-6756965/v1), 2025-08-07
Supplement: Supplementary file 1 [file a7a0b31c829f8b1fafb709aa.pdf]

# Weight Assignment for Simulation Scenario Design Elements

This form collects information and asks you to assign importance weights to simulation scenario design elements based on the NLN Jeffries Simulation Theory. Total weights must add up to 100%.

\* Indique une question obligatoire

---

1. Adresse e-mail \*

---

## Participants Description

2. Primary Role \*

*Une seule réponse possible.*

- Simulation Educator
- Simulation Operations Specialist
- Other

3. Please specify your 'Other' role if selected above:

---

## 4. Years of Experience with Simulation \*

*Une seule réponse possible.*

- < 1 year
- 1–3 years
- 4–7 years
- 8–10 years
- 10+ years

## 5. Simulation Certifications or Qualifications (select all that apply)

*Plusieurs réponses possibles.*

- CHSE – Certified Healthcare Simulation Educator
- CHSOS – Certified Healthcare Simulation Operations Specialist
- Other (please specify below)

## 6. If 'Other' certification selected, please specify:

---

## 7. Briefly describe your experience with designing or evaluating simulation scenarios.

---

---

---

---

---

**Assign Weights to Design Elements**

Enter the percentage weight you assign to each simulation design element below. The total should equal 100%.

8. Weight (%) for: Learning Objectives – Clarity, measurability, alignment with learner outcomes \*

0 - 100%

---

9. Weight (%) for: Fidelity – Realism of environment, patient presentation, team dynamics \*

0 - 100%

---

10. Weight (%) for: Complexity – Appropriateness of clinical and cognitive challenge \*

0 - 100%

---

11. Weight (%) for: Participant Roles – Alignment of roles with clinical practice expectations \*

0 - 100%

---

12. Weight (%) for: Scenario Flow & Structure – Logical sequence, timeline, pre-briefing and debriefing inclusion \*

0 - 100%

---

 **Total of all weights (should equal 100%)**

### **Justification and Expert Feedback**

13. Which design element do you believe is \*most critical\* to scenario effectiveness?

*Plusieurs réponses possibles.*

- Learning Objectives
- Fidelity
- Complexity
- Participant Roles
- Scenario Flow & Structure

14. Did any design element seem \*less essential\*?

*Plusieurs réponses possibles.*

- Learning Objectives
- Fidelity
- Complexity
- Participant Roles
- Scenario Flow & Structure

15. Are there additional design elements not listed that should be considered in future weightings?

---

---

---

---

---

16. Would you apply the same weights across all types of learners (e.g., novice vs. advanced)? Why or why not?

---

---

---

---

---

Ce contenu n'est ni rédigé, ni cautionné par Google.

## Google Forms
